# Supplementary material for: The economic burden of measles in children under five in Bangladesh
Source: Research Square preprint supplement (doi:10.21203/rs.3.rs-45001/v3), 2020-11-02
Supplement: Supplementary file 1 [file 426142250f2e8acad98d3275.docx]

**ADDITIONAL FILES**

1. **File name**: Supplementary figures.docx
   **Title**: Supplementary figures
   **Description**: Supplementary tables and figures featuring additional subgroup comparisons and costs in 2018 Bangladeshi Takas (BDT).
